# Supplementary material
Source: MDPI journal article supplement (https://www.mdpi.com/2071-1050/13/11/5834)
Supplement: s1 [file s1]

**Table S1.** Soil conditions before establishing an experiment with winter rapeseed (2016-2018).

| Location | Soil layer, cm | pH <sub>KCl</sub> | SOC, % | mg kg <sup>-1</sup> |                   | Nmin, kg ha <sup>-1</sup> | mg kg <sup>-1</sup> |     |     |     |      |      |     |      |
|----------|----------------|-------------------|--------|---------------------|-------------------|---------------------------|---------------------|-----|-----|-----|------|------|-----|------|
|          |                |                   |        | N-NO <sub>3</sub>   | N-NH <sub>4</sub> |                           | P                   | K   | Mg  | B   | Cu   | Fe   | Mn  | Zn   |
|          |                |                   |        |                     |                   |                           |                     |     |     |     |      |      |     |      |
| 2016     |                |                   |        |                     |                   |                           |                     |     |     |     |      |      |     |      |
| Sahryń   | 0-30           | 7.4               | 2.53   | 20.14               | 3.10              | 91                        | 60                  | 108 | 75  | 3.1 | 8.6  | 510  | 164 | 6.3  |
|          | 30-60          | 7.4               | 1.20   | 9.28                | 1.21              | 41                        | 33                  | 62  | 77  | 0.9 | 6.1  | 520  | 56  | 3.8  |
| Pagów    | 0-30           | 6.8               | 2.04   | 22.56               | 3.31              | 101                       | 83                  | 223 | 113 | 2.7 | 14.2 | 1721 | 517 | 22.7 |
|          | 30-60          | 6.8               | 1.89   | 8.40                | 1.91              | 40                        | 78                  | 217 | 107 | 2.4 | 13.8 | 1678 | 514 | 21.0 |
| Nowiny   | 0-30           | 7.4               | 0.78   | 15.90               | 4.59              | 40                        | 97                  | 221 | 129 | 1.0 | 3.2  | 1757 | 149 | 10,2 |
|          | 30-60          | 7.4               | 0.70   | 16.10               | 1.26              | 68                        | 176                 | 203 | 212 | 1.7 | 4.5  | 2167 | 166 | 3.4  |
| Sławice  | 0-30           | 6.0               | 1.96   | 15.03               | 2.36              | 78                        | 94                  | 178 | 47  | 0.2 | 2.7  | 707  | 132 | 16.3 |
|          | 30-60          | 5.0               | 4.24   | 17.89               | 2.93              | 94                        | 65                  | 56  | 33  | 0.7 | 2.3  | 540  | 110 | 13.2 |
| 2017     |                |                   |        |                     |                   |                           |                     |     |     |     |      |      |     |      |
| Sahryń   | 0-30           | 7.3               | 1.34   | 32.62               | 4.19              | 144                       | 76                  | 162 | 59  | 1.3 | 5.6  | 620  | 181 | 5.7  |
|          | 30-60          | 7.1               | 0.83   | 9.32                | 1.00              | 36                        | 75                  | 71  | 51  | 0.9 | 6.2  | 725  | 118 | 5.2  |
| Pagów*   | 0-30           | 6.5               | 0.97   | 11.86               | 0.69              | 54                        | 118                 | 193 | 110 | 1.4 | 2.5  | 977  | 164 | 16.2 |
|          | 30-60          | 6.7               | 0.47   | 9.97                | 0.80              | 139                       | 60                  | 151 | 95  | 1.3 | 1.6  | 791  | 102 | 6.5  |
| Pagów**  | 0-30           | 6.8               | 1.26   | 13.09               | 2.65              | 68                        | 69                  | 182 | 107 | 1.7 | 2.9  | 875  | 108 | 12.3 |
|          | 30-60          | 6.7               | 0.55   | 6.90                | 2.31              | 40                        | 19                  | 58  | 102 | 0.7 | 1.5  | 779  | 49  | 6.4  |
| Nowiny   | 0-30           | 6.4               | 1.07   | 7.62                | 1.34              | 37                        | 43                  | 167 | 53  | 1.7 | 1.8  | 1395 | 109 | 6.7  |
|          | 30-60          | 6.1               | 0.97   | 11.62               | <1.00             | 52                        | 43                  | 141 | 62  | 0.7 | 1.9  | 1448 | 109 | 7.1  |
| 2018     |                |                   |        |                     |                   |                           |                     |     |     |     |      |      |     |      |
| Sahryń   | 0-30           | 7.2               | 4.98   | 84.25               | 1.54              | 335                       | 12                  | 37  | 64  | 5.8 | 8.8  | 900  | 159 | 9.0  |
|          | 30-60          | 7.4               | 2.88   | 74.48               | 1.26              | 295                       | 7                   | 21  | 78  | 4.1 | 7.9  | 630  | 112 | 7.5  |

\*forecrop maize for graine; \*\*forecrop winter rapeseed

**Table S2.** Characteristics of winter wheat production technology in the experiment (2016/2017–2018/2019).

| Location  | Forecrop         | Side yield of forecrop, t ha <sup>-1</sup> | Cultivar of winter wheat | Mineral fertilization, kg ha <sup>-1</sup>                                         | Sowing date | Harvest date |
|-----------|------------------|--------------------------------------------|--------------------------|------------------------------------------------------------------------------------|-------------|--------------|
| 2016/2017 |                  |                                            |                          |                                                                                    |             |              |
| Sahryń    | Winter rapeseed  | 3.95 (straw)                               | Bamberka                 | N – 150 (treatment 0) and 105 (treatments 1 and No 2); P – 44; K – 83; S – 8;      | 17.09       | 01.08        |
| Pagów     | Winter rapeseed  | 9.25 (straw)                               | Sailor                   | N – 111 (treatment 0) and 78 (treatments 1 and No 2); P – 15; K – 70; Ca – 1       | 10.10       | 04.08        |
| Nowiny    | Winter rapeseed  | 2.00 (straw)                               | Hondia                   | N – 181 (treatment 0) and 126 (treatments 1 and 2); P – 21; K – 50; S – 21         | 29.09       | 03.08        |
| Ślawice   | Winter rapeseed  | 3.80 (straw)                               | Praktik                  | N – 112 (treatment No 0) and 78 (treatments No 1 and No 2); P – 13; K – 25; S – 29 | 30.09       | 01.08        |
| 2017/2018 |                  |                                            |                          |                                                                                    |             |              |
| Sahryń    | Winter rapeseed  | 6.95 (straw)                               | Bamberka                 | N – 160 (treatment 0) and 112 (treatments 1 and 2); P – 35; K – 149; S – 11        | 18.09       | 20.07        |
| Pagów*    | Maize for graine | 29.90 (straw)                              | Arktis                   | N – 238 (treatment 0) and 167 (treatments 1 and No 2); P – 17; K – 50; S – 32      | 18.10       | 22.07        |
| Pagów**   | Winter rapeseed  | 3.30 (straw)                               | Arktis                   | N – 192 (treatment 0) and 134 (treatments 1 and 2); P – 17; K – 50; S – 32         | 14.10       | 22.07        |
| Nowiny    | Winter rapeseed  | 4.80 (straw)                               | Arkadia                  | N – 185 (treatment 0) and 129 (treatments 1 and 2); P – 30; K – 100; S – 3         | 29.09       | 11.07        |
| 2018/2019 |                  |                                            |                          |                                                                                    |             |              |
| Sahryń    | Sugar beet       | 57.00 (leaves)                             | Bamberka                 | N – 156 (treatment 0) and 109 (treatments 1 and No 2); P – 44; K – 174; S – 14     | 22.09       | 23.07        |

\*forecrop maize for graine; \*\*forecrop winter rapeseed

0 – control; 1 – Penergetic (K + P); 2 – Penergetic (K + P) + Azoter

Table S3. Soil conditions after the harvest winter wheat (2017-2019).

| Table 55. Soil conditions after the harvest winter wheat (2017–2019). |                |                      |                   |           |                     |                   |                              |                     |     |     |      |     |      |     |      |
|-----------------------------------------------------------------------|----------------|----------------------|-------------------|-----------|---------------------|-------------------|------------------------------|---------------------|-----|-----|------|-----|------|-----|------|
| Location                                                              | Treat-<br>ment | Soil<br>layer,<br>cm | pH <sub>KCl</sub> | SOC,<br>% | mg kg <sup>-1</sup> |                   | Nmin,<br>kg ha <sup>-1</sup> | mg kg <sup>-1</sup> |     |     |      |     |      |     |      |
|                                                                       |                |                      |                   |           | N-NO <sub>3</sub>   | N-NH <sub>4</sub> |                              | P                   | K   | Mg  | B    | Cu  | Fe   | Mn  | Zn   |
| 2017                                                                  |                |                      |                   |           |                     |                   |                              |                     |     |     |      |     |      |     |      |
| Sahryń                                                                | 0              | 0-30                 | 7.5               | 2.10      | 28.18               | 1.12              | 114                          | 44                  | 58  | 66  | 2.6  | 7.1 | 470  | 173 | 7.7  |
|                                                                       |                | 30-60                | 7.8               | 1.28      | 19.45               | 3.43              | 89                           | 4                   | 25  | 68  | 1.7  | 6.2 | 520  | 107 | 4.9  |
|                                                                       | 1              | 0-30                 | 7.5               | 2.40      | 10.25               | 1.30              | 45                           | 86                  | 79  | 80  | 2.5  | 8.0 | 520  | 170 | 7.1  |
|                                                                       |                | 30-60                | 7.6               | 2.04      | 6.14                | 1.35              | 29                           | 33                  | 33  | 93  | 2.0  | 7.9 | 690  | 99  | 5.5  |
|                                                                       | 2              | 0-30                 | 7.5               | 1.92      | 19.70               | 1.61              | 83                           | 90                  | 62  | 69  | 2.4  | 7.0 | 520  | 174 | 7.3  |
|                                                                       |                | 30-60                | 7.7               | 1.36      | 19.82               | 1.86              | 85                           | 5                   | 21  | 69  | 1.8  | 6.4 | 570  | 112 | 5.6  |
| Pagów                                                                 | 0              | 0-30                 | 6.6               | 0.95      | 14.62               | 1.65              | 70                           | 92                  | 165 | 103 | 1.6  | 2.6 | 957  | 108 | 8.8  |
|                                                                       |                | 30-60                | 6.4               | 0.26      | 3.59                | 0.94              | 20                           | 19                  | 67  | 69  | 0.6  | 1.2 | 620  | 33  | 2.6  |
|                                                                       | 1              | 0-30                 | 6.4               | 0.89      | 4.32                | 1.56              | 25                           | 76                  | 208 | 106 | 1.6  | 2.7 | 863  | 118 | 8.2  |
|                                                                       |                | 30-60                | 6.4               | 0.32      | 13.78               | 1.14              | 64                           | 26                  | 114 | 95  | 0.6  | 1.7 | 782  | 43  | 3.0  |
|                                                                       | 2              | 0-30                 | 6.5               | 1.21      | 13.45               | 1.18              | 63                           | 97                  | 175 | 100 | 2.2  | 3.8 | 792  | 120 | 13.4 |
|                                                                       |                | 30-60                | 6.8               | 0.38      | 5.61                | 1.13              | 29                           | 45                  | 72  | 105 | 0.7  | 3.7 | 785  | 63  | 7.4  |
| Nowiny                                                                | 0              | 0-30                 | 6.7               | 1.72      | 9.90                | <1.00             | 47                           | 75                  | 148 | 82  | 0.5  | 2.9 | 1528 | 137 | 8.2  |
|                                                                       |                | 30-60                | 6.8               | 0.95      | 11.00               | <1.00             | 52                           | 76                  | 162 | 51  | 0.8  | 3.1 | 1490 | 131 | 8.3  |
|                                                                       | 1              | 0-30                 | 6.5               | 1.37      | 11.80               | <1.00             | 55                           | 47                  | 129 | 51  | 1.0  | 2.5 | 1376 | 104 | 7.4  |
|                                                                       |                | 30-60                | 6.3               | 0.81      | 11.40               | <1.00             | 53                           | 41                  | 151 | 92  | 1.0  | 2.5 | 1409 | 106 | 7.0  |
|                                                                       | 2              | 0-30                 | 6.4               | 1.19      | 14.40               | <1.00             | 60                           | 96                  | 229 | 74  | 0.6  | 3.4 | 1779 | 144 | 11.7 |
|                                                                       |                | 30-60                | 6.2               | 1.57      | 11.70               | <1.00             | 50                           | 92                  | 253 | 52  | 0.5  | 3.2 | 1738 | 116 | 10.0 |
| Sławice                                                               | 0              | 0-30                 | 5.5               | 1.12      | 31.05               | 1.34              | 126                          | 27                  | 139 | 53  | 1.5  | 3.0 | 895  | 150 | 12.8 |
|                                                                       |                | 30-60                | 5.3               | 1.05      | 31.49               | 2.24              | 132                          | 22                  | 139 | 41  | 1.6  | 3.3 | 877  | 158 | 13.5 |
|                                                                       | 1              | 0-30                 | 5.7               | 0.49      | 26.92               | 1.28              | 106                          | 72                  | 74  | 68  | 0.9  | 2.4 | 577  | 103 | 12.2 |
|                                                                       |                | 30-60                | 5.2               | 0.85      | 30.13               | 2.18              | 130                          | 85                  | 99  | 74  | 1.2  | 2.7 | 597  | 125 | 16.9 |
|                                                                       | 2              | 0-30                 | 5.7               | 0.49      | 28.61               | 1.42              | 116                          | 72                  | 74  | 68  | 0.9  | 2.4 | 577  | 103 | 12.2 |
|                                                                       |                | 30-60                | 5.2               | 0.85      | 32.94               | 2.39              | 136                          | 85                  | 99  | 74  | 1.2  | 2.7 | 597  | 125 | 16.9 |
| 2018                                                                  |                |                      |                   |           |                     |                   |                              |                     |     |     |      |     |      |     |      |
| Sahryń                                                                | 0              | 0-30                 | 7.3               | 1.20      | 8.30                | 3.30              | 50                           | 61                  | 129 | 71  | 1.7  | 8.1 | 874  | 171 | 8.3  |
|                                                                       |                | 30-60                | 7.4               | 0.79      | 5.56                | 2.67              | 35                           | 21                  | 52  | 59  | 1.4  | 7.1 | 1074 | 151 | 7.3  |
|                                                                       | 1              | 0-30                 | 7.2               | 1.19      | 9.51                | 5.47              | 64                           | 78                  | 158 | 61  | 1.4  | 7.4 | 695  | 188 | 6.6  |
|                                                                       |                | 30-60                | 7.2               | 0.59      | 4.68                | 2.86              | 32                           | 9                   | 62  | 56  | 2.3  | 6.9 | 953  | 127 | 6.8  |
|                                                                       | 2              | 0-30                 | 7.1               | 0.94      | 5.30                | 3.52              | 38                           | 61                  | 104 | 54  | 1.4  | 6.3 | 697  | 188 | 6.0  |
|                                                                       |                | 30-60                | 7.0               | 0.40      | 1.67                | 2.60              | 18                           | 32                  | 71  | 46  | 0.5  | 6.7 | 889  | 75  | 4.4  |
| Pagów*                                                                | 0              | 0-30                 | 7.4               | 0.97      | 8.58                | 1.91              | 41                           | 140                 | 340 | 82  | 1.4  | 3.7 | 1511 | 188 | 15.6 |
|                                                                       |                | 30-60                | 7.7               | 0.38      | 8.46                | 1.88              | 40                           | 141                 | 357 | 85  | 0.6  | 2.3 | 1067 | 113 | 5.0  |
|                                                                       | 1              | 0-30                 | 7.0               | 1.19      | 10.13               | 2.15              | 48                           | 73                  | 224 | 85  | 1.5  | 3.8 | 1634 | 204 | 15.8 |
|                                                                       |                | 30-60                | 7.5               | 0.50      | 8.39                | 1.39              | 38                           | 151                 | 114 | 75  | 0.9  | 3.2 | 1524 | 130 | 6.0  |
|                                                                       | 2              | 0-30                 | 6.8               | 0.16      | 8.30                | 2.19              | 41                           | 79                  | 173 | 95  | 0.90 | 2.1 | 1472 | 201 | 12.3 |
|                                                                       |                | 30-60                | 6.8               | 0.96      | 6.66                | 1.51              | 32                           | 174                 | 171 | 97  | 1.0  | 2.4 | 1555 | 89  | 2.9  |
| Pagów**                                                               | 0              | 0-30                 | 7.0               | 1.03      | 16.86               | 2.06              | 74                           | 89                  | 299 | 64  | 1.3  | 3.2 | 1680 | 158 | 10.8 |
|                                                                       |                | 30-60                | 6.7               | 0.27      | 22.37               | 1.23              | 92                           | 21                  | 110 | 124 | 0.9  | 2.4 | 1154 | 90  | 5.4  |
|                                                                       | 1              | 0-30                 | 7.3               | 0.76      | 13.45               | 2.49              | 62                           | 110                 | 195 | 66  | 1.3  | 3.4 | 1723 | 168 | 10.6 |
|                                                                       |                | 30-60                | 6.5               | 0.32      | 14.88               | 1.44              | 64                           | 34                  | 90  | 105 | 1.1  | 2.8 | 1628 | 91  | 6.4  |
|                                                                       | 2              | 0-30                 | 6.8               | 0.97      | 14.71               | 2.05              | 65                           | 83                  | 130 | 126 | 1.9  | 3.8 | 1786 | 149 | 14.3 |
|                                                                       |                | 30-60                | 6.8               | 0.34      | 10.75               | 1.84              | 49                           | 40                  | 53  | 117 | 1.2  | 3.5 | 1938 | 111 | 8.8  |
| Nowiny                                                                | 0              | 0-30                 | 6.1               | 1.35      | 19.20               | <1.00             | 86                           | 45                  | 159 | 168 | 0.4  | 2.0 | 1457 | 107 | 6.8  |
|                                                                       |                | 30-60                | 6.2               | 1.04      | 24.00               | <1.00             | 108                          | 40                  | 133 | 161 | 0.5  | 1.6 | 1337 | 113 | 5.9  |
|                                                                       | 1              | 0-30                 | 6.1               | 1.13      | 12.80               | <1.00             | 58                           | 35                  | 140 | 153 | 0.6  | 1.8 | 1440 | 109 | 7.1  |
|                                                                       |                | 30-60                | 6.3               | 1.07      | 15.10               | <1.00             | 68                           | 38                  | 140 | 150 | 0.6  | 1.9 | 1373 | 109 | 8.4  |
|                                                                       | 2              | 0-30                 | 6.2               | 1.63      | 13.30               | <1.00             | 57                           | 107                 | 192 | 182 | 0.7  | 3.2 | 1461 | 107 | 7.8  |
|                                                                       |                | 30-60                | 6.2               | 1.49      | 13.60               | <1.00             | 59                           | 72                  | 144 | 173 | 0.8  | 3.0 | 1425 | 104 | 10.2 |

| Location | Treat-<br>ment | Soil<br>layer,<br>cm | pH <sub>KCl</sub> | SOC,<br>% | mg kg <sup>-1</sup> |                   | Nmin,<br>kg ha <sup>-1</sup> | mg kg <sup>-1</sup> |     |     |     |     |     |     |     |
|----------|----------------|----------------------|-------------------|-----------|---------------------|-------------------|------------------------------|---------------------|-----|-----|-----|-----|-----|-----|-----|
|          |                |                      |                   |           | N-NO <sub>3</sub>   | N-NH <sub>4</sub> |                              | P                   | K   | Mg  | B   | Cu  | Fe  | Mn  | Zn  |
| 2019     |                |                      |                   |           |                     |                   |                              |                     |     |     |     |     |     |     |     |
| Sahryń   | 0              | 0-30                 | 7.5               | 2.82      | 18.40               | <1.00             | 72                           | 39                  | 66  | 82  | 4.4 | 7.5 | 682 | 190 | 7.0 |
|          |                | 30-60                | 7.5               | 2.52      | 31.00               | <1.00             | 121                          | 109                 | 75  | 82  | 4.9 | 7.8 | 663 | 205 | 8.0 |
|          | 1              | 0-30                 | 7.6               | 1.74      | 21.70               | 2.53              | 95                           | 10                  | 25  | 123 | 2.6 | 6.7 | 486 | 63  | 5.2 |
|          |                | 30-60                | 7.6               | 1.74      | 19.50               | 2.13              | 84                           | 4                   | 21  | 81  | 3.2 | 6.5 | 474 | 92  | 4.8 |
|          | 2              | 0-30                 | 7.5               | 2.34      | 21.10               | <1.00             | 82                           | 17                  | 42  | 88  | 7.8 | 7.5 | 485 | 192 | 7.7 |
|          |                | 30-60                | 7.7               | 1.42      | 11.50               | 2.05              | 53                           | 4                   | <17 | 108 | 3.1 | 6.2 | 497 | 129 | 5.9 |

\*forecrop maize\*\*forecrop winter repeseed

0 – control; 1 – Penergetic (K + P); 2 – Penergetic (K + P) + Azoter
